# Supplementary material for: Tumor growth suppression in adoptive T cell therapy via IFN-γ targeting of tumor vascular endothelial cells
Source: PubMed Central journal article supplement (PMC11610145; doi:10.7150/thno.101107), 2024-10-21
Supplement: thnov14p6897s1.pdf [file thnov14p6897s1.pdf]

**Supplementary information for**

**Tumor growth suppression in adoptive T cell therapy via IFN- $\gamma$  targeting of tumor vascular endothelial cells**

Qiaoya Lin<sup>1</sup>, Colleen P. Olkowski<sup>1</sup>, Peter L. Choyke<sup>1</sup>, Noriko Sato<sup>1,\*</sup>

1. Molecular Imaging Branch, Center for Cancer Research, National Cancer Institute, National Institutes of Health, Bethesda, Maryland.

**\*Correspondence:**

Noriko Sato, MD, PhD. Molecular Imaging Branch, Center for Cancer Research, National Cancer Institute, National Institutes of Health, Bethesda, MD 20892

Phone: 1+240-858-3079; Fax: 1+240-541-4526

Email: [saton@mail.nih.gov](mailto:saton@mail.nih.gov)

## **Supplementary materials and methods**

### **The short-term *in situ* intravital imaging**

After disinfecting the mouse using betadine solution and 70% ethanol, the tumor area was delineated with a marker pen. The epidermis was carefully incised using forceps and scissors. Sterile saline was applied to the tumor area to prevent tissue desiccation. Subsequently, the mouse was positioned in either the right or left decubitus position, depending on the tumor inoculation site, within a custom-designed chamber. To stabilize the xenograft tumor, surgical tape was applied to the silicone bed, and a metal frame was securely affixed using homemade nuts. The mice were then prepared for intravital imaging studies, with a maximum imaging duration of 6 h. Following intravital imaging, mice were promptly euthanized via cervical dislocation while under anesthesia.

## Supplementary tables

**Table S1: Antibodies used in the study.**

| <b>Antibodies for flow cytometry</b>              | <b>Source</b>             | <b>Clone</b> | <b>Catalog #</b> |
|---------------------------------------------------|---------------------------|--------------|------------------|
| Anti-mouse CD119 (IFN $\gamma$ R1) antibody, PE   | Thermo Fisher Scientific  | 2E2          | 2069166          |
| Armenian Hamster IgG isotype control antibody, PE | Thermo Fisher Scientific  | eBio299Arm   | 12-4888-83       |
| Anti-mouse CD45.1 (Ly5.1) antibody, PE            | BioLegend                 | A20          | 110708           |
| Anti-mouse CD45.2 (Ly5.2) antibody, APC           | Thermo Fisher Scientific  | 104          | 17-0454-82       |
| Anti-mouse CD8 antibody, Brilliant Violet 650     | Thermo Fisher Scientific  | 53-6.7       | 100742           |
| Anti-mouse NK1.1 antibody, PE                     | Thermo Fisher Scientific  | PK136        | 12-5941-83       |
| Anti-mouse IFN $\gamma$ antibody, APC             | BioLegend                 | XMG1.2       | 505810           |
| Rat IgG1, k isotype control antibody, APC         | BioLegend                 | RTK2071      | 400412           |
| Anti-mouse-CD90.1 (Thy1.1) antibody, PE-Cy7       | Thermo Fisher Scientific  | HIS51        | 25-0900-82       |
| Anti-mouse-CD90.2 (Thy1.2) antibody, eFluor 450   | Thermo Fisher Scientific  | 53-2.1       | 48-0920-82       |
| Anti-mouse CD11b antibody, FITC                   | PharMingen/BD Biosciences | M1/70        | 017140           |
| Anti-mouse CD16/32 antibody                       | Thermo Fisher Scientific  | 93           | 4289662          |
| <b>Antibodies for <i>in vivo</i> infusion</b>     | <b>Source</b>             | <b>Clone</b> | <b>Catalog #</b> |
| Anti-mouse CD90.1 (Thy1.1) antibody, APC          | Thermo Fisher Scientific  | HIS51        | 17-0900-82       |
| Anti-mouse CD31 antibody, Alexa Fluor 647         | BioLegend                 | 390          | 102416           |
| Anti-mouse CD31 antibody, APC                     | Thermo Fisher Scientific  | 390          | 17-0311-80       |
| <b>Antibodies for histology</b>                   | <b>Source</b>             | <b>Clone</b> | <b>Catalog #</b> |
| Anti-mouse CD31 antibody                          | Cell Signaling Technology | D8V9E        | 77699S           |
| Anti-phospho-STAT1 (Tyr701) antibody              | Cell Signaling Technology | 58D6         | 9167S            |
| Anti-CAIX antibody                                | Abcam                     | EPR4151      | Ab108351         |

**Table S2: Mouse strains, cell lines, reagents, software and instruments used in the study.**

| <b>Mice stains</b>                                                                       | <b>Source</b>            | <b>Catalog #</b> |
|------------------------------------------------------------------------------------------|--------------------------|------------------|
| C57BL/6J                                                                                 | Jackson Laboratory       | 000664           |
| B6.SJL- <i>Ptprc<sup>a</sup>Pepc<sup>b</sup></i> /BoyJ (Ly5.1)                           | Jackson Laboratory       | 002014           |
| B6.PL- <i>Thy1<sup>a</sup></i> /CyJ (Thy1.1)                                             | Jackson Laboratory       | 000406           |
| Ifngyr1 <sup>-/-</sup> , B6.129S7- <i>Ifngr1<sup>tm1Agt</sup></i> /J (IFN $\gamma$ R1KO) | Jackson Laboratory       | 003288           |
| B6.Cg-Tg(Tek-cre)12Flv/J (Tie2 <sup>Cre</sup> )                                          | Jackson Laboratory       | 004128           |
| C57BL/6N- <i>Ifngr1<sup>tm1.1Rds</sup></i> /J (IFN $\gamma$ R1 <sup>fllox/fllox</sup> )  | Jackson Laboratory       | 25394            |
| B6.129(Cg)- <i>Gt(ROSA)26Sor<sup>tm4(CTBtdTomato-EGFP)Luo</sup></i> /J (mTmG)            | Jackson Laboratory       | 007676           |
| B6.129S4- <i>Ifng<sup>tm3.1Lky</sup></i> /J (GREAT)                                      | Jackson Laboratory       | 17581            |
| C57BL/6-Tg(TeraTcrb)1100Mjb/J                                                            | Jackson Laboratory       | 003831           |
| <b>Reagents and column</b>                                                               | <b>Source</b>            | <b>Catalog #</b> |
| eBioscience™ Fixable Viability Dye eFluor™ 455UV                                         | Thermo Fisher Scientific | 65-0868-18       |
| RPMI1640 medium                                                                          | Thermo Fisher Scientific | 11875-093        |
| Fetal bovine serum                                                                       | Gemini                   | 100-106          |
| Penicillin-Streptomycin (10,000 U/mL penicillin, 10,000 $\mu$ g/mL streptomycin)         | Thermo Fisher Scientific | 15140-122        |
| Phosphate-buffered saline, without calcium and magnesium                                 | Corning                  | 21-040-CV        |
| 2-mercaptoethanol                                                                        | Sigma                    | M3148-100 ml     |
| Ovalbumin (OVA) peptide (SIINFEKL)                                                       | AnaSpec                  | AS-60193-1       |
| Human interleukin-2                                                                      | Peprtech                 | 200-02           |
| Lymphocyte Separation Medium                                                             | Promo Cell GmbH          | C-44010          |
| Liberase TM                                                                              | Millipore Sigma          | 5401119001       |
| Ethylenediaminetetraacetic acid                                                          | Phoenix BioTechnologies  | 2004             |
| Foxp3/Transcription Factor Staining Buffer Kit                                           | Thermo Fisher Scientific | 00-5523-00       |
| M-PER Mammalian Protein Extraction Reagent                                               | Thermo Fisher Scientific | 78501            |
| Protease inhibitor cocktail                                                              | Crystalgen               | 225-015          |
| Opal Automation IHC Kit                                                                  | Akoya Bioscience         | NEL871001KT      |
| Sucrose                                                                                  | Fluka Analytical         | B4097            |
| Paraformaldehyde                                                                         | Thermo Fisher Scientific | J19943.K2        |

|                                                                                   |                               |                |
|-----------------------------------------------------------------------------------|-------------------------------|----------------|
| Mounting medium containing DAPI                                                   | Thermo Fisher Scientific      | 00-4959-52     |
| Serum bovine albumin                                                              | Millipore Sigma               | A9418-50G      |
| IRDye 800CW NHS ester                                                             | LI-COR Biosciences            | 929-70020      |
| PD-10 Desalting Column                                                            | Cytiva                        | 17085101       |
| <b>Software and instruments</b>                                                   | <b>Source</b>                 | <b>Version</b> |
| FlowJo software                                                                   | BD Life Sciences              | v10.8          |
| Image J software                                                                  | National Institutes of Health | Fiji           |
| ZEN software                                                                      | Carl Zeiss                    | 3.2            |
| GraphPad Prism software                                                           | GraphPad Software             | 10.0.2 (232)   |
| CytoFLEX LX flow cytometer                                                        | Beckman Coulter               | N/A            |
| ZEISS LSM 880 laser scanning confocal microscope                                  | Carl Zeiss                    | N/A            |
| Bond RXm autostainer                                                              | Leica Biosystems              | N/A            |
| Pearl™ Imager                                                                     | LI-COR Biosciences            | N/A            |
| Mantra Quantitative Pathology Workstation with the Inform Image Analysis Software | Perkin Elmer                  | Inform 2.5     |

Supplementary figures

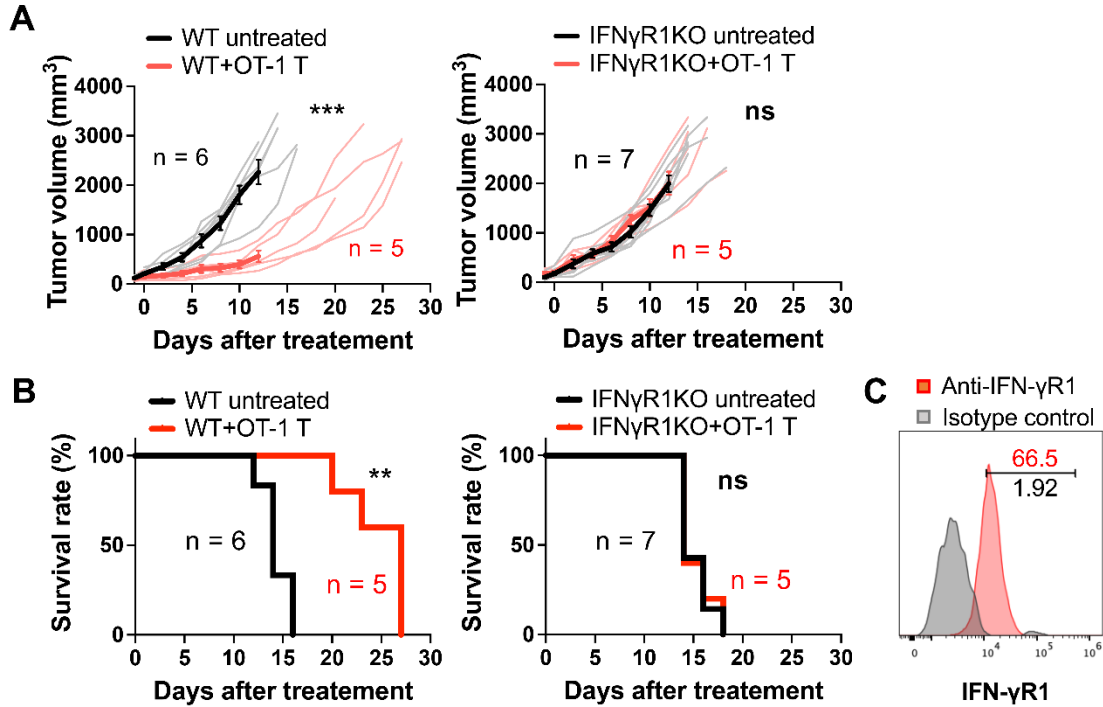

**Figure S1.** Requirement for IFN- $\gamma$ R1 expression on non-tumor cells for the tumor suppression in ACT.

**A**, ACT suppressed the growth of MOC2-SIINFEKL oral squamous cell carcinoma tumors in WT mice but failed to show efficacy in IFN $\gamma$ R1KO mice. Thin line: volume of individual tumor, bold line: average tumor volume. \*\*\*:  $P < 0.001$ ; ns, not significant, by repeated-measure two-way ANOVA.

**B**, ACT prolonged survival of WT mice bearing MOC2-SIINFEKL tumors but failed in IFN $\gamma$ R1KO mice. \*\*:  $P < 0.01$ ; ns, not significant, by log-rank (Mantel–Cox) test.

**C**, Flow cytometry analysis indicated expression of IFN- $\gamma$ R1 in MOC2-SIINFEKL tumors *in vivo* (representative data of  $n = 3$ ).

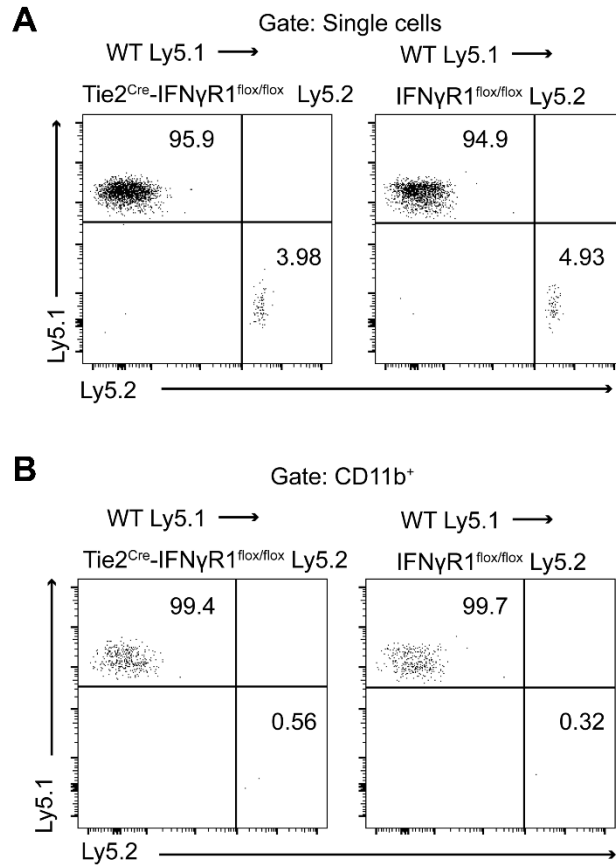

**Figure S2.** Successful reconstitution of peripheral blood mononuclear cells with donor-derived cells in the bone marrow chimera mice.

**A,** Flow cytometric analysis of Ly5.1 and Ly5.2 expression in peripheral blood mononuclear cells in Tie2<sup>cre</sup>IFN $\gamma$ R1<sup>fllox/fllox</sup> and IFN $\gamma$ R1<sup>fllox/fllox</sup> mice (expressing Ly5.2) transferred with the bone marrow from Ly5.1 WT mice (WT Ly5.1 → Tie2<sup>cre</sup>IFN $\gamma$ R1<sup>fllox/fllox</sup> Ly5.2 and WT Ly5.1 → IFN $\gamma$ R1<sup>fllox/fllox</sup> Ly5.2, respectively). Analyses were performed 6 weeks after bone marrow transfer (n = 3, representative data). Gated on single live cells.

**B,** Data in **A** were further analyzed by gating on CD11b<sup>+</sup> myeloid cell populations.

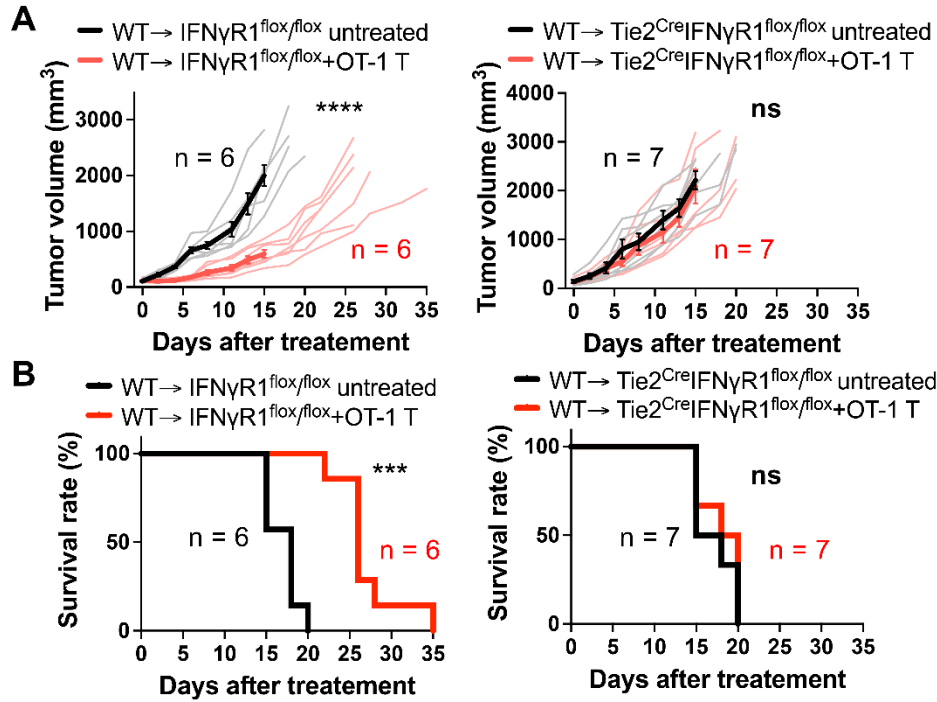

**Figure S3.** Requirement for IFN- $\gamma$ R1 expression on endothelial cells for the tumor suppression in ACT.

**A**, ACT suppressed MOC2-SIIFEKL tumor growth in control WT → IFN $\gamma$ R1<sup>flx/flx</sup> bone marrow chimera mice but failed to demonstrate efficacy in WT → Tie2<sup>cre</sup>IFN $\gamma$ R1<sup>flx/flx</sup> bone marrow chimera mice that lack IFN- $\gamma$ R1 in endothelial cells. Thin line: volume of individual tumor, bold line: average tumor volume. \*\*\*\*:  $P < 0.0001$ ; ns: not significant, by repeated-measure two-way ANOVA.

**B**, Prolonged survival following ACT was observed in control WT → IFN $\gamma$ R1<sup>flx/flx</sup> bone marrow chimeras bearing MOC2-SIINFEKL tumors but was abrogated in WT → Tie2<sup>cre</sup>IFN $\gamma$ R1<sup>flx/flx</sup> bone marrow chimeras. \*\*\*:  $P < 0.001$ ; ns, not significant, by log-rank (Mantel–Cox) test.



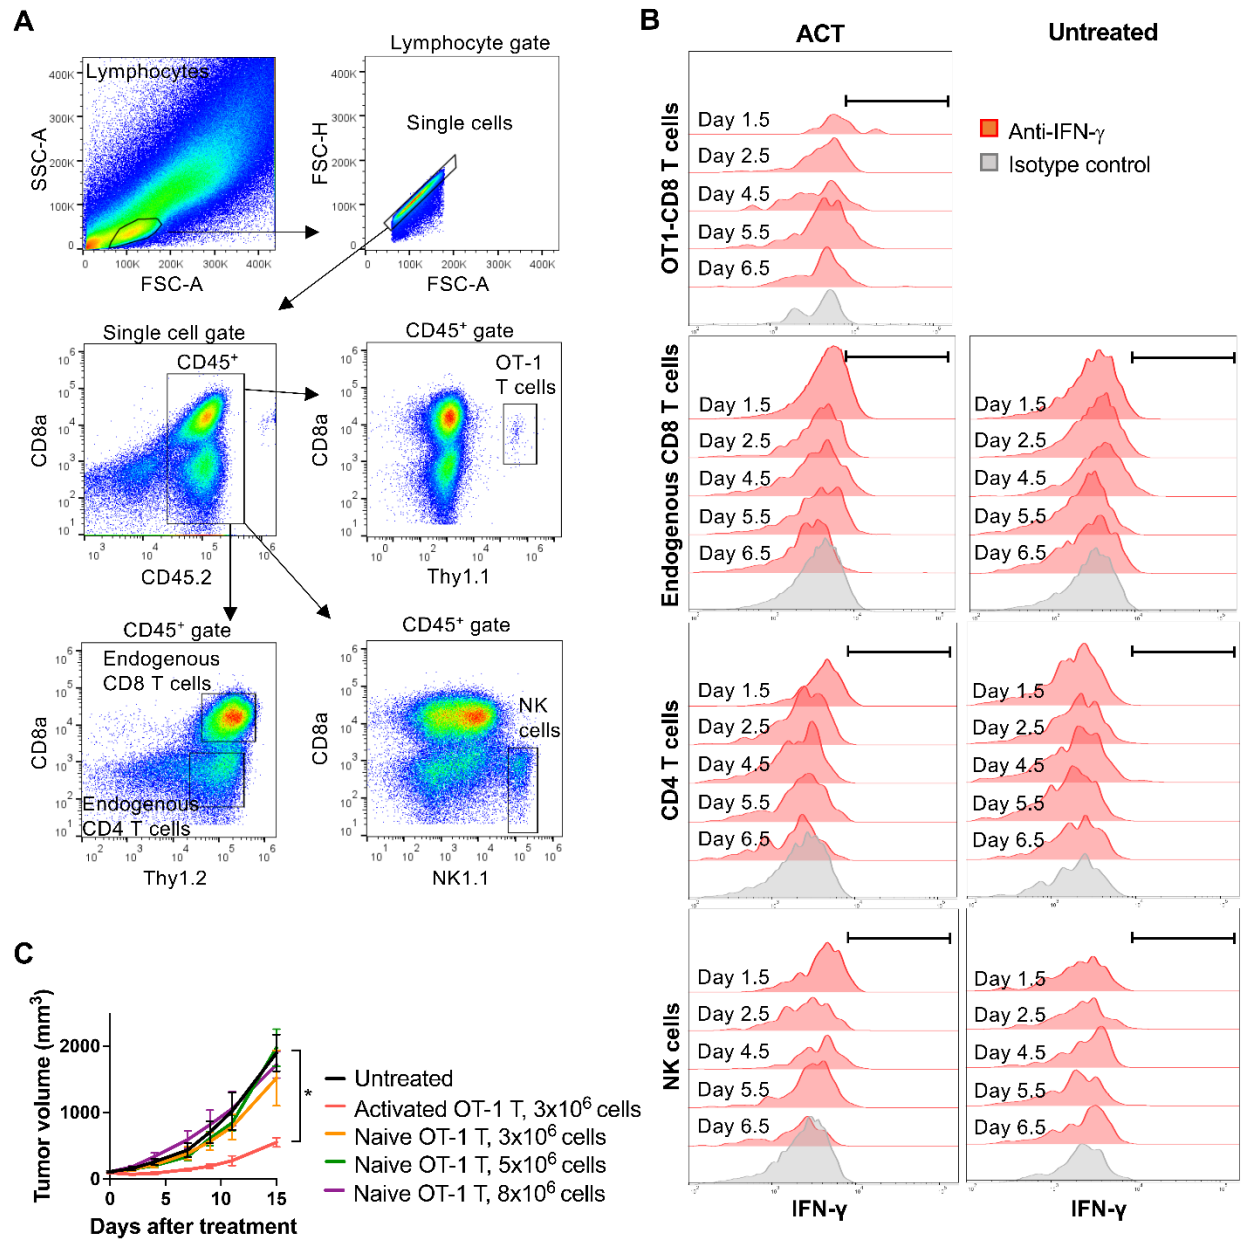

**Figure S4.** Levels of IFN- $\gamma$  production in transferred activated OT-1 CD8 T cells and endogenous lymphocytes in the tumor after ACT, and ineffective therapy by naïve OT-1 CD8 T cells.

**A,** Representative gating strategy.

**B,** Representative flow cytometry data of IFN- $\gamma$  expression levels in transferred *ex vivo* activated OT-1 CD8 T cells and endogenous CD8 T, CD4 T and NK cells collected from MCA-205-OVA-GFP tumors

indicated days after ACT or without ACT (n = 3, except for Day 6.5 untreated group that had n = 2). Marker represents IFN- $\gamma$ <sup>+</sup> fraction.

C, Naïve OT-1 CD8 T cells failed to suppress MCA-205-OVA-GFP tumor growth even with increasing doses of cells, in contrast to activated OT-1 CD8 T cells in WT mice. n = 3 for the activated OT-1 T cell groups, n = 4 for other groups. \*: p < 0.05, analyzed by repeated-measure two-way ANOVA comparing to the untreated group.

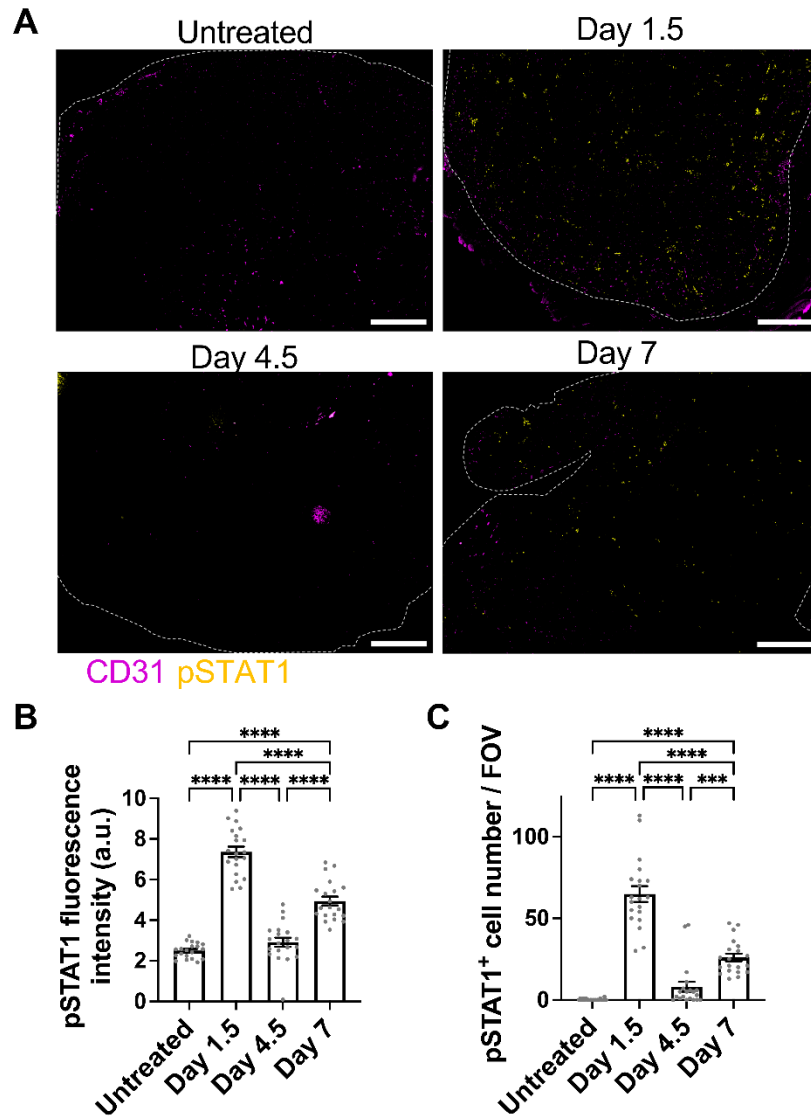

**Figure S5.** Induction of IFN- $\gamma$ /STAT1 signaling in the tumor.

**A,** Representative immunofluorescence images of MCA-205-OVA-GFP tumor tissue sections in the untreated group and Day 1.5, Day 4.5, and Day 7 after ACT (n = 2), Scale bar: 500  $\mu$ m.

**B,** Quantitation of pSTAT1-fluorescence intensity of the immunofluorescence images obtained in A. Each symbol indicates the average pSTAT1 fluorescence intensity in a FOV. Two tumors, 10 FOVs per tumor, were analyzed per group. \*\*\*\*: P < 0.0001, by one-way ANOVA.

**C**, Similarly, pSTAT1<sup>+</sup> cell number in each FOV is summarized. Each symbol indicates individual FOV and 10 FOVs per tumor, two tumors per group, were analyzed. \*\*\*:  $P < 0.001$ ; \*\*\*\*:  $P < 0.0001$ , by one-way ANOVA.

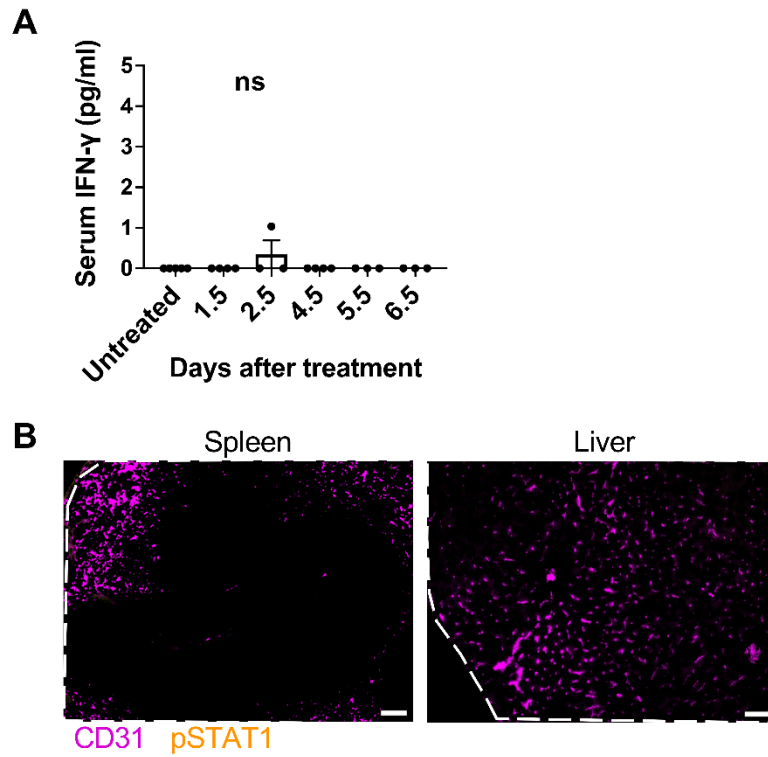

**Figure S6.** Minimal effect of IFN- $\gamma$  on normal endothelial cells.

**A**, ELISA revealed minimal or undetectable IFN- $\gamma$  levels in the serum at different time points after T cell transfer.  $n = 3 - 5$ . ns, not significant in the comparison of any two groups by one-way ANOVA.

**B**, Representative immunofluorescence images of liver and spleen tissue sections on Day 1.5 in the ACT group ( $n = 3$ ). No pSTAT1 was detected. White dashed lines indicate tissue boundaries. Scale bar: 50  $\mu\text{m}$ .

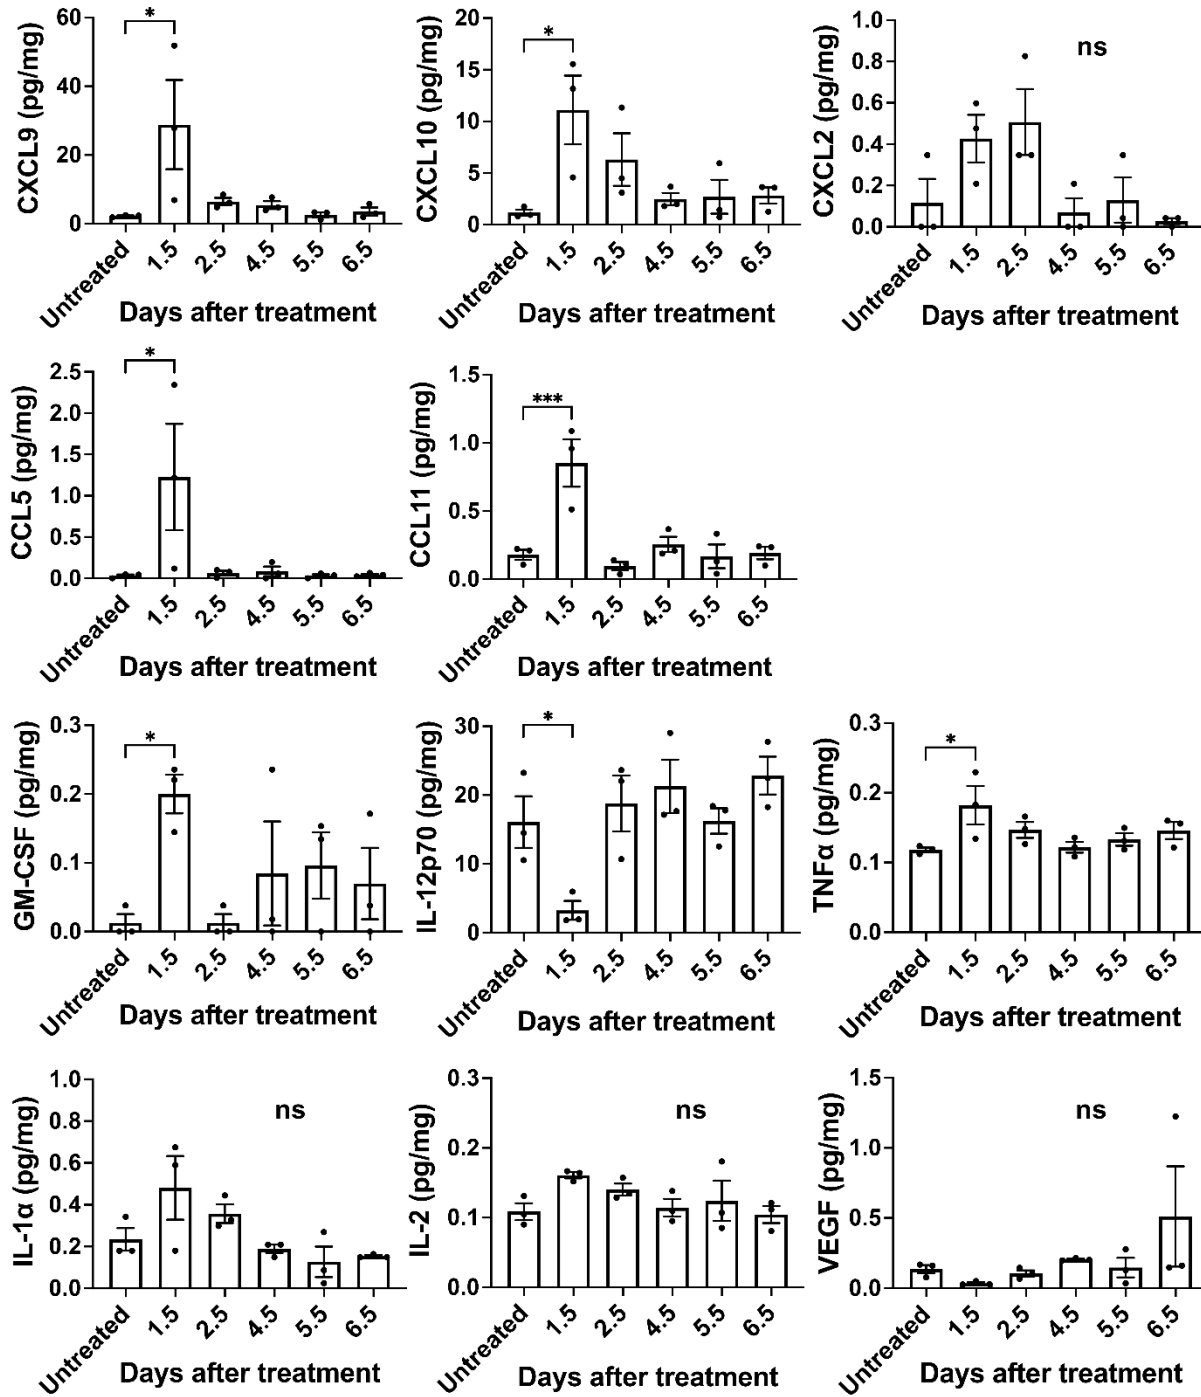

**Figure S7.** Changes in cytokine/chemokine expressions in the tumor microenvironment after ACT.

Changes in indicated cytokine and chemokine concentrations in MCA-205-OVA-GFP tumors were analyzed at indicated time points after ACT (n = 3). One-way ANOVA was used to compare the values in the treatment groups against the untreated control. \*: p < 0.05, \*\*\*: p < 0.001, ns: not significant.

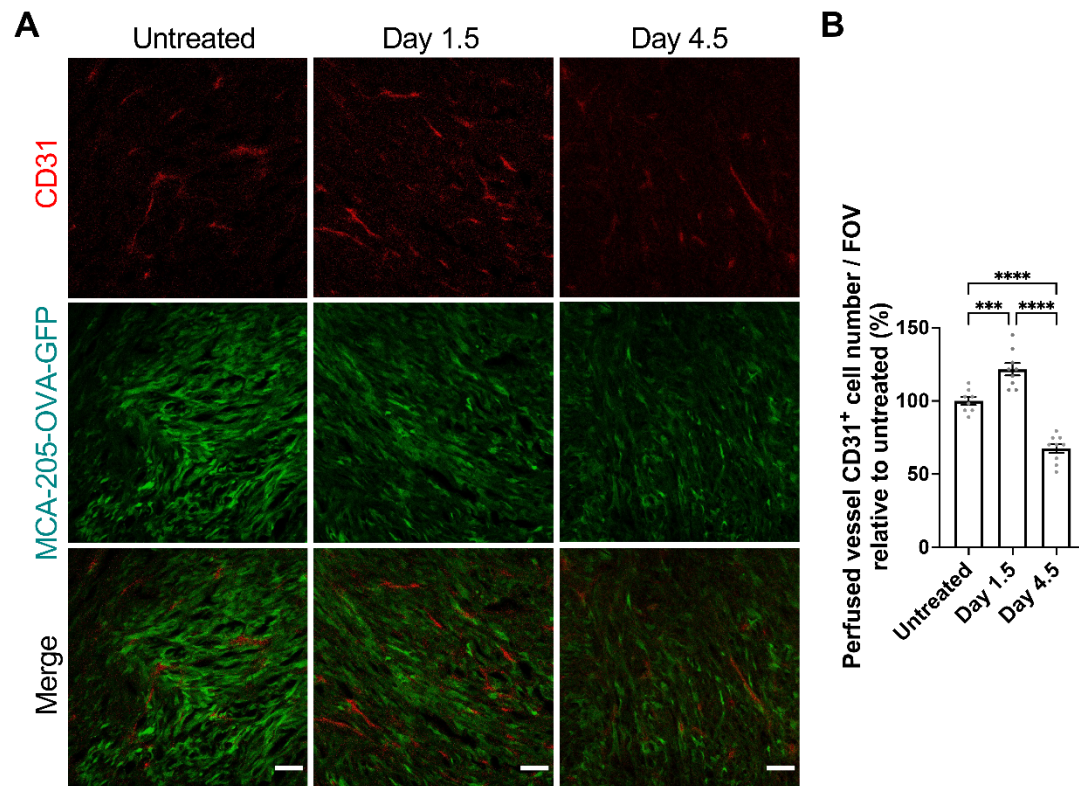

**Figure S8.** Decreased functional tumor blood vessels after ACT.

**A**, APC-conjugated anti-CD31 antibody was intravenously infused to mice bearing MCA-205-OVA-GFP tumor untreated or Days 1.5 and 4.5 after ACT. Endothelial cells in the vessels with perfusion were stained with the anti-CD31 antibody. Representative immunofluorescence images of tumor tissue sections without *ex vivo* staining (n = 3). Scale bar: 50  $\mu$ m.

**B**, Quantitation of images obtained in **A**. Each symbol represents CD31<sup>+</sup> cell number associated with vessels with perfusion observed per FOV. Three FOVs from 2 tumors and two FOVs from one tumor were analyzed in the untreated group, and three FOVs per tumor, 3 tumors were analyzed for Day 1.5 and Day 4.5 after ACT. \*\*\*: P < 0.001; \*\*\*\*: P < 0.0001, by one-way ANOVA.

### **Legends for supplementary movies**

**Movie S1:** A 3D video generated from the representative intravital microcopy images shown in Figure 4B, demonstrating OT-1 T cell interaction with endothelial cells at Day 1.5 after ACT. mTmG-OT-1 CD8 T cells expressing Tdtomato (magenta) were transferred to MCA-205-OVA-GFP tumor (green)-bearing mice. mTmG-OT-1 CD8 T cells were observed inside or near tumor vessels (red) that were labeled *in vivo* with Alexa Fluor 647-conjugated anti-CD31 antibody.

**Movie S2:** A 3D video demonstrating infiltration of mTmG-OT-1 CD8 T cells (magenta) into the MCA-205-OVA-GFP tumor (GFP) microenvironment, away from vessels (CD31, red) at Day 5 post-ACT. Tumor vessels were barely detectable. Refer to Figure 4B.

**Movie S3:** A 3D video illustrating significant infiltration of mTmG-OT-1 CD8 T cells (magenta) into the MCA-205-OVA-GFP tumor (GFP) microenvironment, away from vessels (CD31, red) at Day 7 post-ACT. Narrow vessels appeared on Day 7. Refer to Figure 4B.
